# Supplementary material for: Potential effects of rapeseed peptide Maillard reaction products on aging-related disorder attenuation and gut microbiota modulation in d-galactose induced aging mice
Source: Royal Society of Chemistry journal article supplement (doi:10.1039/c9fo00791a), 2019-01-01
Supplement: c9fo00791a1.pdf [file c9fo00791a1.pdf]

## **Potential effects of rapeseed peptides Maillard reaction products on aging-related disorder attenuation and gut microbiota modulation in D-galactose induced aging mice**

Shudong He <sup>a,b,c,1</sup>, Zuoyong Zhang <sup>a,1</sup>, Hanju Sun <sup>a,c,\*</sup>, Yuchen Zhu <sup>d</sup>, Xiaodong Cao <sup>a,c</sup>, Yongkang Ye <sup>a,c</sup>, Junhui Wang <sup>a,c</sup>, Yanping Cao <sup>b,\*\*</sup>

<sup>a</sup> School of Food and Biological Engineering, Engineering Research Center of Bio-process of Ministry of Education, Hefei University of Technology, Hefei 230009, Anhui, China

<sup>b</sup> Beijing Advanced Innovation Center for Food Nutrition and Human Health, Beijing Technology and Business University (BTBU), Beijing 100048, China

<sup>c</sup> Anhui Province Key Laboratory of Functional Compound Seasoning, Anhui Qiangwang Seasoning Food Co., Ltd., Jieshou 236500, Anhui, China

<sup>d</sup> College of Food Science and Nutritional Engineering, China Agricultural University, Beijing 100083, China

<sup>1</sup> means the co-first authors.

\* Correspondence to : H. Sun, . Hefei University of Technology, Hefei 230009, Anhui, China. Email: [sunhanjv@yeah.net](mailto:sunhanjv@yeah.net)

\*\* Correspondence to : Y. Cao, . Beijing Technology and Business University (BTBU), Beijing 100048, China. Email: [caoy@th.btbu.edu.cn](mailto:caoy@th.btbu.edu.cn)

**Table S1A** Changes of urine fluorescence intensity in mice fed with different diets during the 6 experimental weeks.

| Group | Urine fluorescence intensity (AU) |                |                 |                     |                |                |                |
|-------|-----------------------------------|----------------|-----------------|---------------------|----------------|----------------|----------------|
|       | 0 week                            | 1st week       | 2nd week        | 3rd week            | 4th week       | 5th week       | 6th week       |
| AC    | 200.42±2.04A,g                    | 210.10±1.56B,f | 218.44±4.29C,e  | 228.88±2.41D,d      | 235.92±2.35D,c | 242.77±3.11D,b | 251.40±1.76D,a |
| NC    | 185.79±1.76B,f                    | 194.24±2.14D,e | 196.93±2.76D,de | 201.28±3.63F,c<br>d | 204.42±3.07F,c | 210.60±1.85F,b | 215.41±1.91F,a |
| DG    | 184.82±3.48B,e                    | 195.27±2.19D,d | 199.38±3.21D,d  | 206.25±3.11E,c      | 209.66±2.21E,c | 214.68±1.54E,b | 225.05±1.59E,a |
| LMRPs | 183.44±3.09B,g                    | 203.09±1.76C,f | 222.59±2.42C,e  | 259.07±2.51C,d      | 266.87±2.30C,c | 289.39±1.58C,b | 306.53±2.32C,a |
| MMRPs | 183.93±4.38B,g                    | 212.73±2.71B,f | 236.09±1.60B,e  | 266.10±1.77B,d      | 281.67±2.48B,c | 308.81±1.74B,b | 320.15±3.12B,a |
| HMRPs | 184.79±3.23B,g                    | 227.36±2.22A,f | 248.80±2.76A,e  | 285.34±1.81A,d      | 308.83±3.09A,c | 329.36±1.09A,b | 357.34±2.31A,a |

The highest and lowest values of urine fluorescence intensity were removed prior to the average. Results are expressed as the mean ± standard deviation (n = 6-8/group). Values followed by different capital letters in the same column mean statistically significant differences ( $p < 0.05$ ) among different treated groups. Values followed by different lowercase letters in the same line mean statistically significant differences ( $p < 0.05$ ) in a same group among the different experimental weeks.

**Table S1B** Changes of fecal color in mice fed with different diets during the 6 experimental weeks.

| Time (week) | Fecal color |                 |                |                 |                 |                 |                |
|-------------|-------------|-----------------|----------------|-----------------|-----------------|-----------------|----------------|
|             | AC          | NC              | DG             | LMRPs           | MMRPs           | HMRPs           |                |
| 0           | <i>L</i> *  | 52.55±0.76B,a   | 61.78±1.63A,a  | 62.30±0.58A,a   | 62.44±1.05A,a   | 62.25±1.73A,a   | 62.77±1.33A,a  |
|             | <i>a</i> *  | 2.72±0.37A,e    | 1.86±0.16B,e   | 2.11±0.16B,f    | 2.02±0.17B,g    | 2.05±0.10B,g    | 1.99±0.24B,g   |
|             | <i>b</i> *  | 12.40±0.22A,e   | 8.37±0.22B,f   | 8.21±0.25B,f    | 8.75±0.48B,g    | 8.50±0.38B,g    | 8.39±0.31B,g   |
| 1           | <i>L</i> *  | 51.72±0.88B,ab  | 60.87±1.81A,ab | 59.91±0.82A,ab  | 54.86±2.55B,b   | 54.26±2.32B,b   | 52.31±2.08B,b  |
|             | <i>a</i> *  | 2.92±0.21B,de   | 2.04±0.18D,de  | 2.39±0.15C,ef   | 2.99±0.15B,f    | 3.18±0.18B,f    | 3.87±0.16A,f   |
|             | <i>b</i> *  | 12.99±0.37A,de  | 8.89±0.25D,e   | 8.81±0.24D,e    | 10.46±0.31C,f   | 11.62±0.44B,f   | 12.57±0.49A,f  |
| 2           | <i>L</i> *  | 50.84±1.30B,abc | 60.14±1.9A,ab  | 59.14±1.13A,b   | 51.02±1.80B,c   | 49.23±1.67BC,c  | 47.63±1.57C,c  |
|             | <i>a</i> *  | 3.06±0.25D,de   | 2.32±0.21E,d   | 2.74±0.28DE,de  | 4.05±0.21C,e    | 4.75±0.33B,e    | 5.62±0.37A,e   |
|             | <i>b</i> *  | 13.48±0.35B,d   | 9.36±0.21D,de  | 9.78±0.23D,d    | 12.58±0.28C,e   | 13.67±0.43B,e   | 15.42±0.39A,e  |
| 3           | <i>L</i> *  | 50.26±1.64B,abc | 59.34±1.17A,ab | 58.34±1.65A,bc  | 48.75±1.96BC,cd | 46.20±2.71CD,cd | 44.65±1.86D,cd |
|             | <i>a</i> *  | 3.43±0.35D,cd   | 2.67±0.23E,c   | 3.01±0.23DE,cd  | 4.67±0.25C,d    | 5.69±0.22B,d    | 6.65±0.26A,d   |
|             | <i>b</i> *  | 14.13±0.36C,c   | 9.83±0.31F,d   | 10.69±0.31E,c   | 13.39±0.20D,d   | 15.69±0.35B,d   | 17.33±0.28A,d  |
| 4           | <i>L</i> *  | 49.77±0.77B,bc  | 58.83±1.16A,ab | 57.73±2.33A,bcd | 47.12±1.25BC,de | 44.38±2.29CD,d  | 42.17±1.75D,de |
|             | <i>a</i> *  | 3.88±0.36D,bc   | 3.08±0.24E,b   | 3.22±0.22E,c    | 5.11±0.22C,c    | 6.22±0.34B,c    | 7.60±0.34A,c   |
|             | <i>b</i> *  | 14.73±0.28Cb    | 10.32±0.33E,c  | 11.76±0.39D,b   | 14.44±0.38C,c   | 16.79±0.22B,c   | 18.45±0.46A,c  |
| 5           | <i>L</i> *  | 49.37±1.77B,bc  | 58.26±2.09A,b  | 56.17±1.31A,cd  | 45.28±2.07C,ef  | 43.42±2.12CD,de | 40.35±1.65D,ef |
|             | <i>a</i> *  | 4.24±0.33D,ab   | 3.42±0.19E,b   | 3.61±0.25E,b    | 5.98±0.27C,b    | 6.92±0.23B,b    | 8.83±0.27A,b   |
|             | <i>b</i> *  | 15.27±0.37D,ab  | 10.81±0.27F,b  | 12.02±0.41E,b   | 16.52±0.32C,b   | 17.43±0.26B,b   | 19.58±0.33A,b  |
| 6           | <i>L</i> *  | 48.58±1.34F,c   | 57.93±2.18E,b  | 55.25±1.61D,d   | 42.87±2.12C,f   | 40.52±1.43B,e   | 37.69±1.99A,f  |
|             | <i>a</i> *  | 4.75±0.26D,a    | 3.88±0.17E,a   | 4.02±0.15E,a    | 6.53±0.34C,a    | 7.88±0.31B,a    | 9.95±0.22A,a   |
|             | <i>b</i> *  | 15.84±0.39D,a   | 11.46±0.31F,a  | 12.60±0.32E,a   | 17.90±0.29C,a   | 18.58±0.33B,a   | 20.64±0.31A,a  |

The highest and lowest values of fecal color were removed prior to the average. Results are expressed as the mean ± standard deviation (n = 6-8/group). Values followed by different capital letters in the same column mean statistically significant differences ( $p < 0.05$ ) among different treated groups. Values followed by different lowercase letters in the same line mean statistically significant differences ( $p < 0.05$ ) in a same group among the different experimental weeks.

**Table S2** Protein contents of serum, liver, kidney and brain in mice fed with different diets during the 6 experimental weeks.

| Group | Protein content (gprot/L) |              |              |             |
|-------|---------------------------|--------------|--------------|-------------|
|       | Serum                     | Liver        | Kidney       | Brain       |
| AC    | 48.61±1.84b               | 14.87±0.22bc | 11.06±0.56b  | 2.07±0.41b  |
| NC    | 57.75±2.58a               | 15.92±0.25a  | 12.28±0.95a  | 3.13±0.35a  |
| DG    | 48.58±2.79b               | 14.51±0.44c  | 11.04±0.71b  | 2.10±0.16b  |
| LMRPs | 49.19±1.80b               | 14.99±0.72b  | 11.26±0.45b  | 2.47±0.36b  |
| MMRPs | 54.80±2.11a               | 15.61±0.76a  | 11.57±0.99ab | 2.88±0.38a  |
| HMRPs | 56.26±2.61a               | 15.80±0.51a  | 11.70±0.78a  | 2.92 ±0.52a |

The highest and lowest values of protein content were removed prior to the average. Results are expressed as the mean ± standard deviation (n = 6-8/group). Values followed by different lowercase letters in the same column mean statistically significant differences ( $p < 0.05$ ) among different treated groups.

**Table S3** Serum antioxidant capacities of mice in different treated groups

| Group | Serum antioxidant capacity |                 |              |               |               |
|-------|----------------------------|-----------------|--------------|---------------|---------------|
|       | CAT (U/ml)                 | T-AOC (Unit/ml) | SOD (U/ml)   | GSH-PX (U/ml) | MDA (nmol/ml) |
| AC    | 3.85±0.56cd                | 4.56±0.52b      | 85.26±1.03d  | 583.62±2.14f  | 6.03±0.23b    |
| NC    | 7.68±0.34a                 | 8.18±0.53a      | 113.72±1.33a | 744.28±2.60a  | 2.39±0.19f    |
| DG    | 3.53±0.27d                 | 4.41±0.37b      | 83.39±0.85e  | 589.34±2.31e  | 6.50±0.20a    |
| LMRPs | 4.45±0.43c                 | 5.03±0.48b      | 86.51±0.96d  | 604.68±2.16d  | 5.65±0.16c    |
| MMRPs | 6.01±0.43b                 | 6.82±0.71 a     | 95.06±0.64c  | 663.69±2.86c  | 4.68±0.22d    |
| HMRPs | 6.73±0.26b                 | 7.19±1.31a      | 99.50±0.94b  | 686.31±2.55b  | 3.95±0.13e    |

The highest and lowest values of serum antioxidant capacity were removed prior to the average. Results are expressed as the mean ± standard deviation (n = 6-8/group). Values followed by different lowercase letters in the same column mean statistically significant differences ( $p < 0.05$ ) among different treated groups.
